# Supplementary material for: ADAMTS1 Supports Endothelial Plasticity of Glioblastoma Cells with Relevance for Glioma Progression
Source: PubMed Central journal article supplement (PMC7823850; doi:10.3390/biom11010044), 2020-12-31
Supplement: biomolecules-11-00044-s001.pdf [file biomolecules-11-00044-s001.pdf]

**Supplementary Table S1. Sequences of used primers for genes of interest.**

Genes of interest and their use (qPCR or Sanger sequencing). Both forward and reverse sequences are indicated.

| Use    | Gene name      | HGNC ID   | Forward sequence<br>(5'-3') | Reverse sequence<br>(5'-3') |
|--------|----------------|-----------|-----------------------------|-----------------------------|
| Sanger | <i>ADAMTS1</i> | HGNC:217  | CTGCTACGAGCGGTGTCTC         | GTGCCGGAGTAGAAGCAGTG        |
|        |                |           | CCCACAGGAACTGGAAGCATA       | CCACTGCCGTGGAATTCTG         |
|        | <i>ACTB</i>    | HGNC:132  | GATGGCCACGGCTGCTT           | AGGACTCCATGCCCAGGAA         |
|        | <i>B2M</i>     | HGNC:914  | GGACTGGTCTTTCTATCTTGT       | TCTCGATCCCACTTAACTATCTTG    |
|        | <i>CDH5</i>    | HGNC:1764 | TGGTCACTCTGCAAGACATCAA      | TCCTCAACAAACAGAGAGCCCACA    |

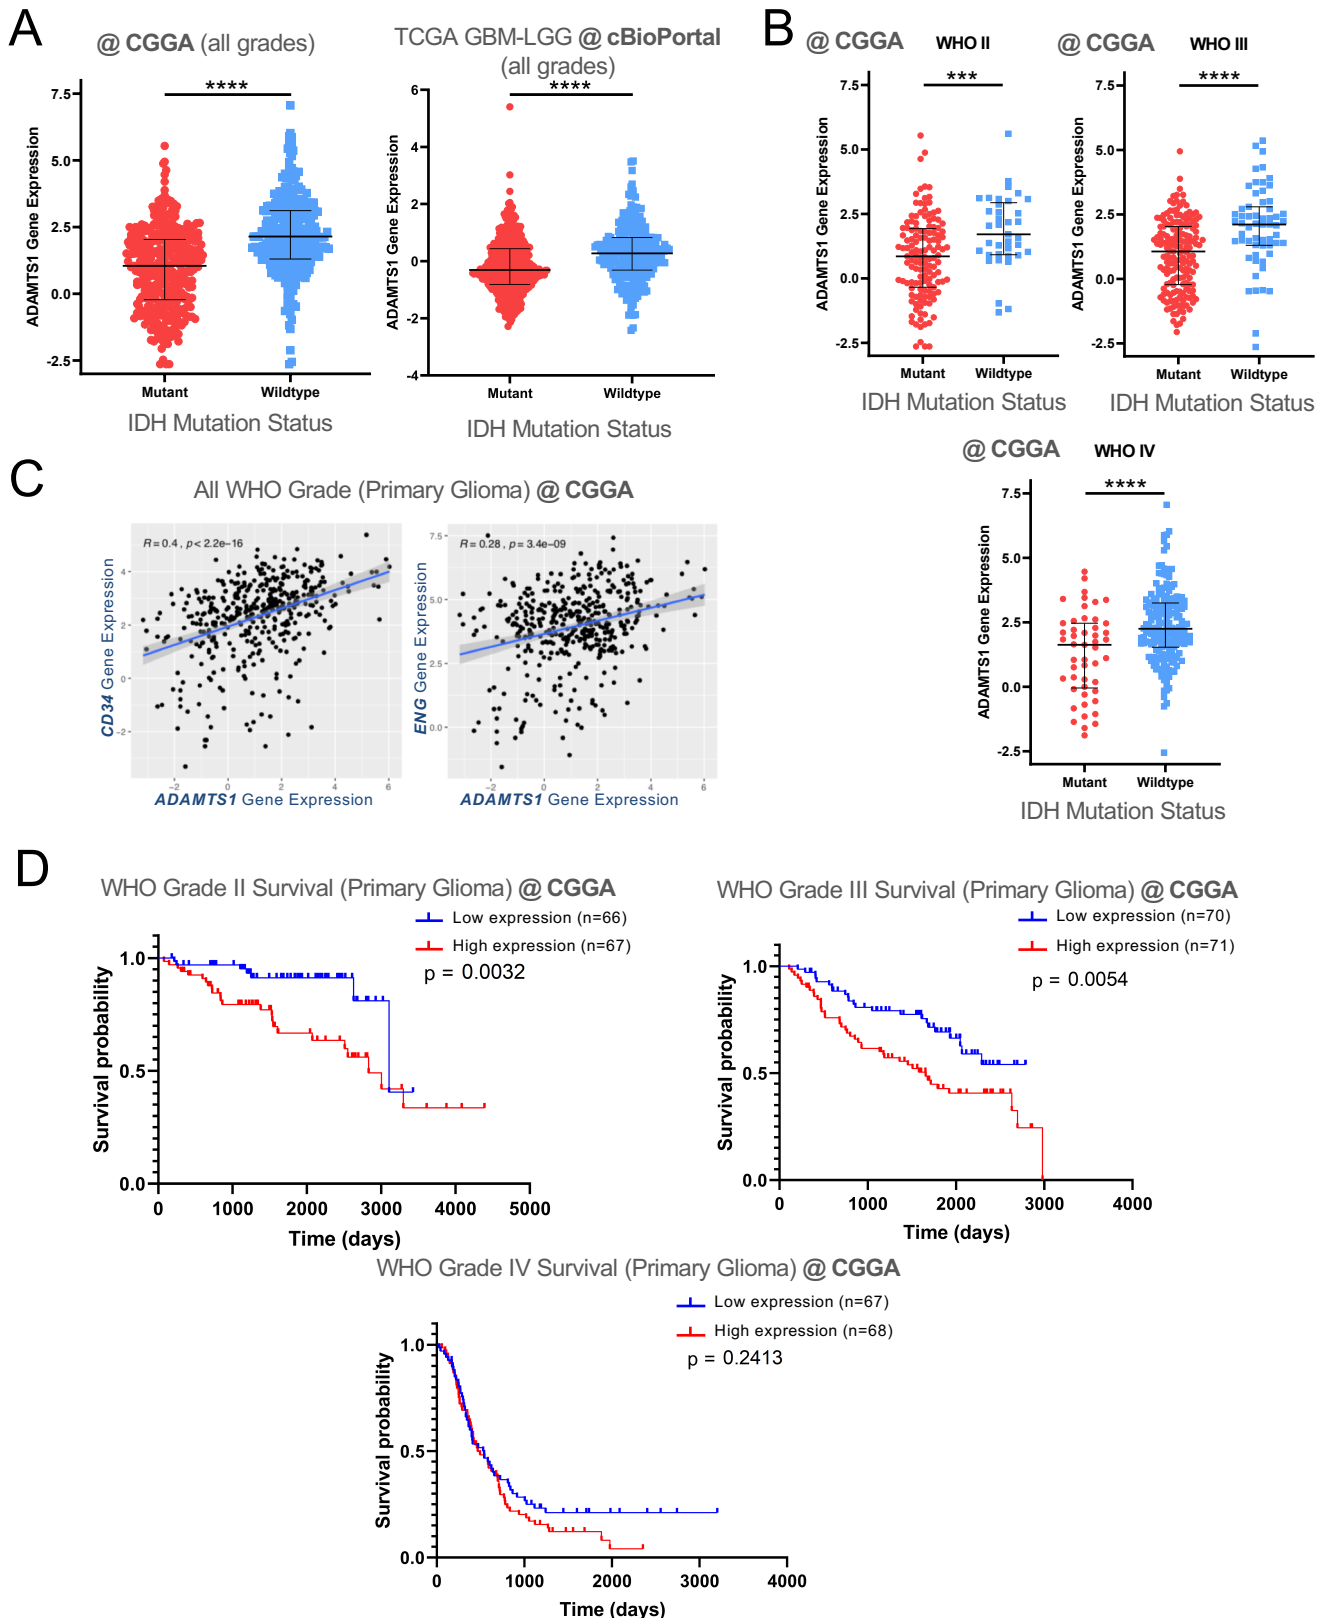

**Supplementary Figure S1.** Additional *in silico* analysis of *ADAMTS1* and endothelial markers in glioma samples from CGGA and TCGA GBM-LGG projects. **(A)** Graphs representing *ADAMTS1* gene expression in glioma samples (all grades) according to IDH mutation status, analyzing both CGGA (left) and TCGA GBM-LGG (right) datasets. TCGA data are analyzed with cBioPortal platform (\*\*\*\*,  $p < 0.0001$  in unpaired t test); **(B)** Graphs representing *ADAMTS1* gene expression among WHO grades II, III and IV in glioma samples of the CGGA project, according to IDH mutation status (\*\*\*\*,  $p < 0.0001$ ; \*\*\*,  $p < 0.001$  in unpaired t test); **(C)** Scatter plots representing correlation analyses between gene expression levels of *ADAMTS1* and endothelial-related genes *CD34* and *ENG* ( $R$ =Pearson correlation coefficient); **(D)** Kaplan Meier survival curves for low and high gene expression levels of *ADAMTS1*, considering WHO grades II, III and IV in glioma grades of the CGGA project.



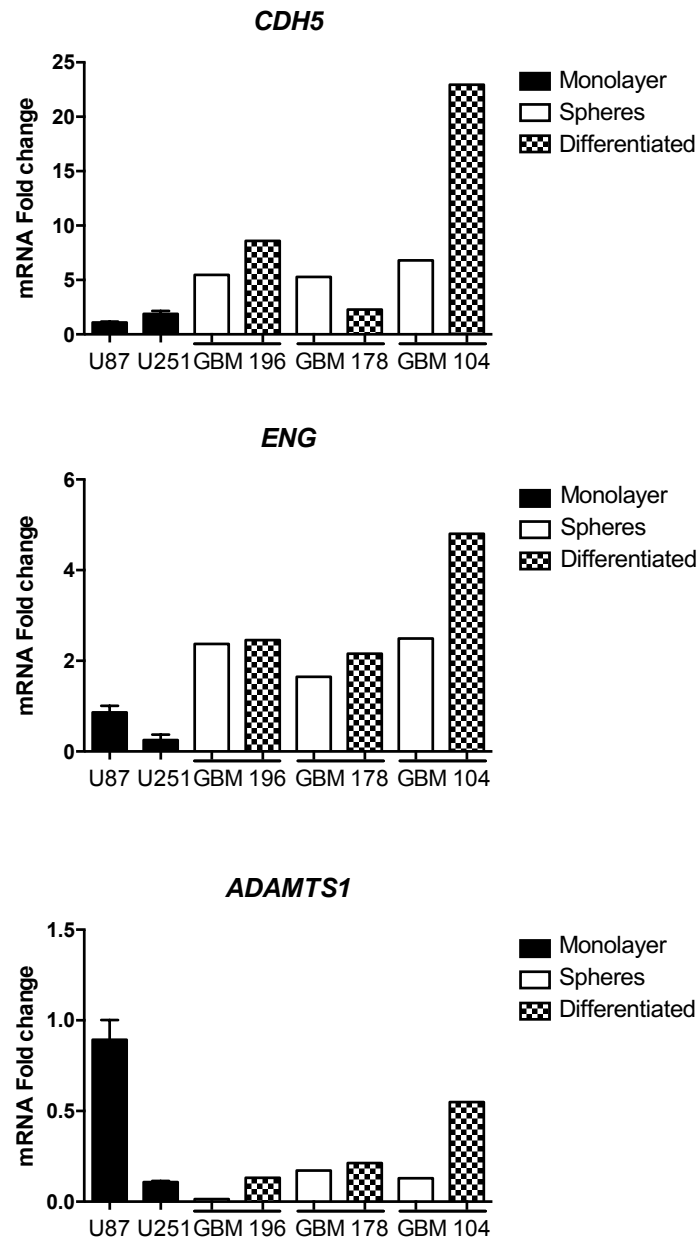

**Supplementary Figure S2.** Global comparison of gene expression values between GBM cell lines and GICs. Graphs represent mRNA fold change expression of *CDH5*, *ENG* and *ADAMTS1* genes in U87-MG and U251-MG cell lines, and GICs in their sphere and differentiated status. All values are relative to U87-MG cell line.

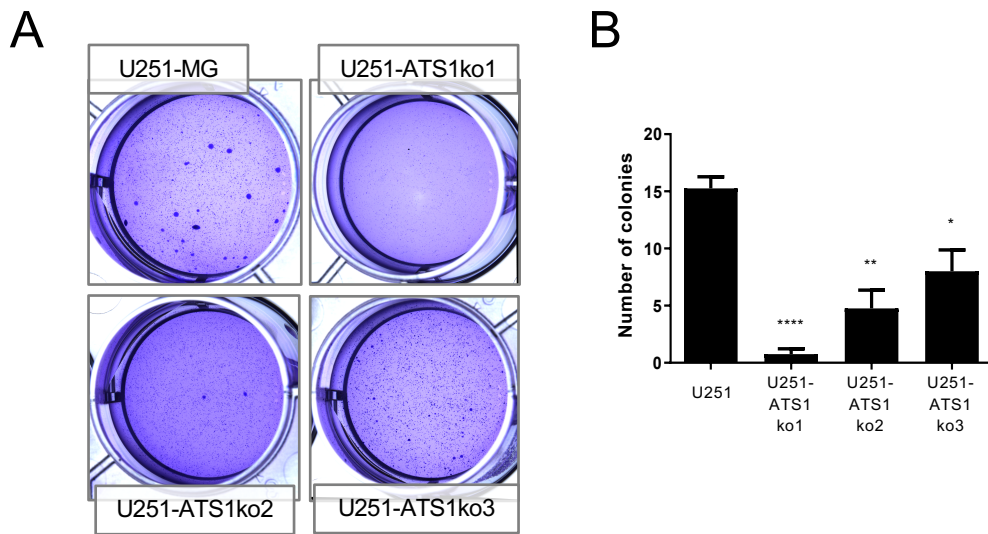

**Supplementary Figure S3.** Evaluation of clonogenic activity of U251-MG cells and its *ADAMTS1*-inhibited clones. **(A)** Representative microscopic images of clonogenic assay with U-251 MG cells, WT and *ATS1*ko clones ; **(B)** Graphs representing quantitative results of clonogenic assay expressed as total number of colonies/well (\*\*\*\*,  $p < 0,0001$ ; \*\*,  $p < 0,01$ ; and \*,  $p < 0,05$ ).

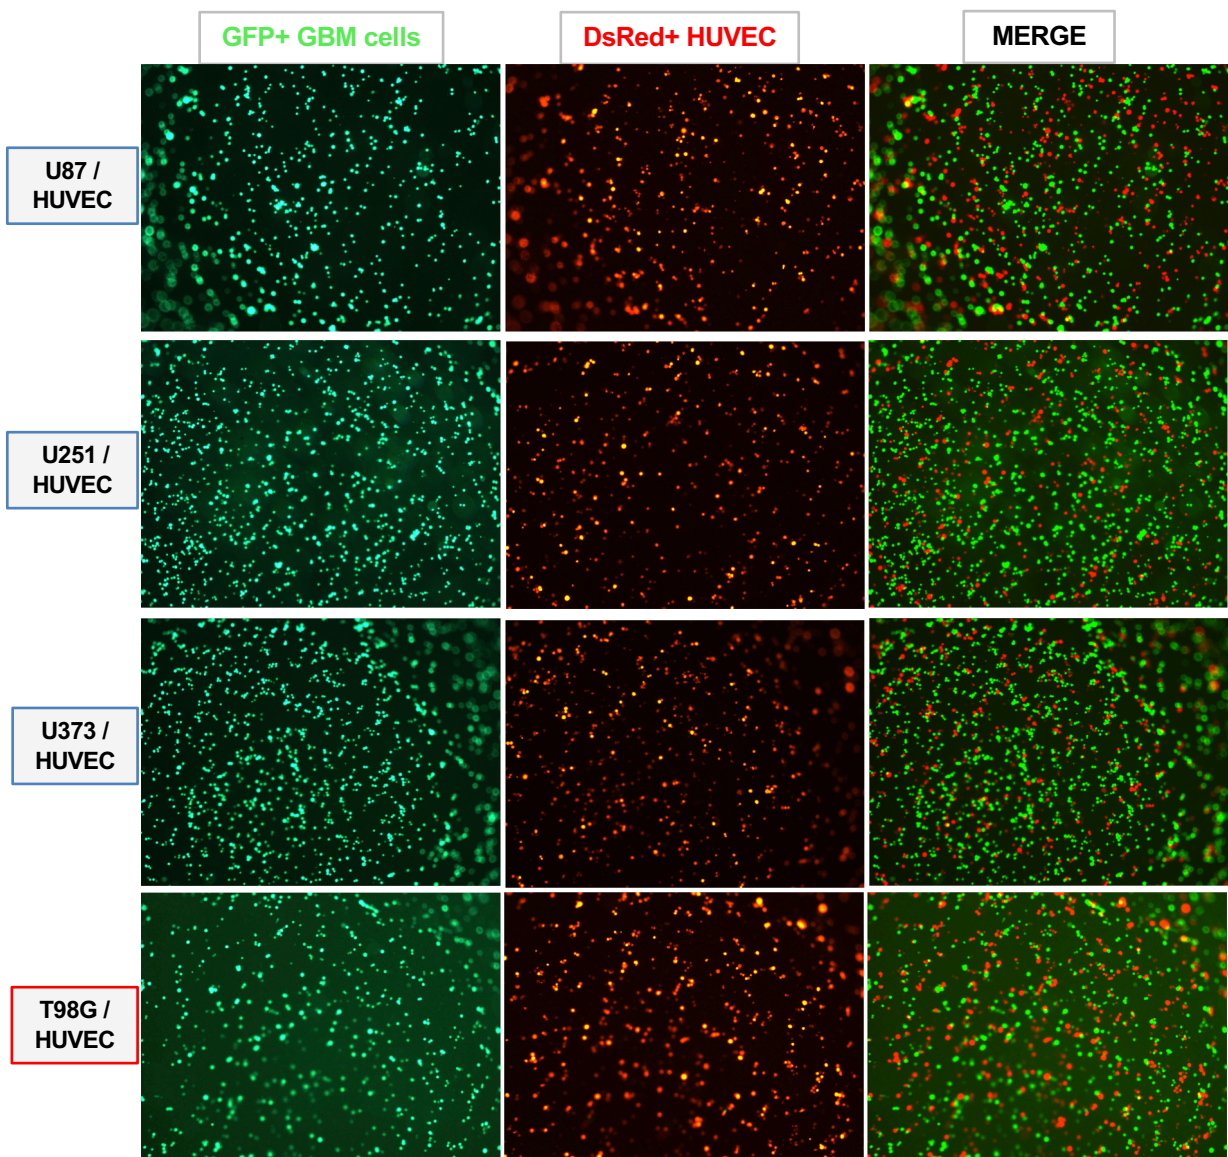

**Supplementary Figure S4.** Associated images at time 0 of co-culture assay presented in Figure 5A. They are representative images of co-culture Matrigel assay containing GBM cells: U87-MG, U251-MG, U373-MG and T98G, from top to bottom (first column, green), co-cultured with HUVECs (second column, red). Third column is the resulting merge of GBM and HUVECs.
